# Supplementary material for: Cooling-induced reactivation of distant faults during long-term geothermal energy production in hot sedimentary aquifers
Source: PubMed Central journal article supplement (PMC8826403; doi:10.1038/s41598-022-06067-0), 2022-02-08
Supplement: 41598_2022_6067_MOESM1_ESM.pdf [file 41598_2022_6067_MOESM1_ESM.pdf]

Supporting Information for

## **Cooling-induced reactivation of distant faults during long-term geothermal energy production in hot sedimentary aquifers**

Iman Rahimzadeh Kivi<sup>1,2\*</sup>, Estanislao Pujades<sup>1,2</sup>, Jonny Rutqvist<sup>3</sup> and Víctor Vilarrasa<sup>1,2,4</sup>

<sup>1</sup> Institute of Environmental Assessment and Water Research, Spanish National Research Council (IDAEA-CSIC), Barcelona, Spain

<sup>2</sup> Associated Unit: Hydrogeology Group (UPC-CSIC), Barcelona, Spain

<sup>3</sup> Energy Geosciences Division, Lawrence Berkeley National Laboratory, CA, USA

<sup>4</sup> Mediterranean Institute for Advanced Studies (IMEDEA), Spanish National Research Council (CSIC), Esporles, Spain

email: [iman.rahimzadeh@idaea.csic.es](mailto:iman.rahimzadeh@idaea.csic.es)\*

### **Introduction**

We present in the Supporting Information the evolution of the pore pressure and stress components along faults 1 (Fig. S1) and 2 (Fig. S2), for the case in which both faults have a low permeability.

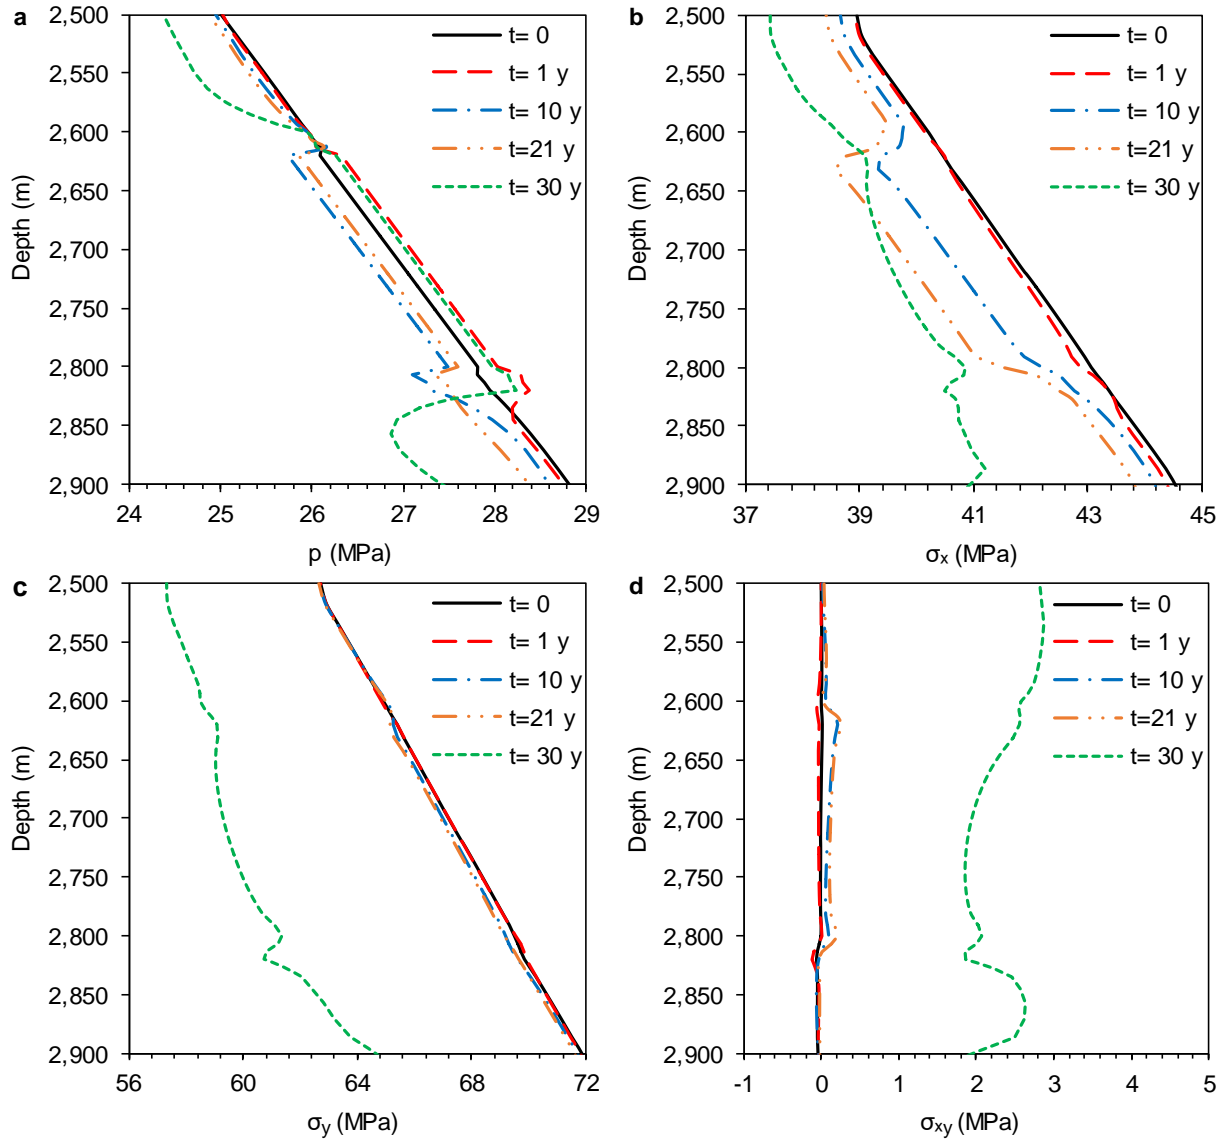

**Figure S1.** Pore pressure and stress evolution in fault 1. Evolution of the pore pressure (a), horizontal stress (b), vertical stress (c) and shear stress (d) along fault 1 at different times during cold water reinjection.

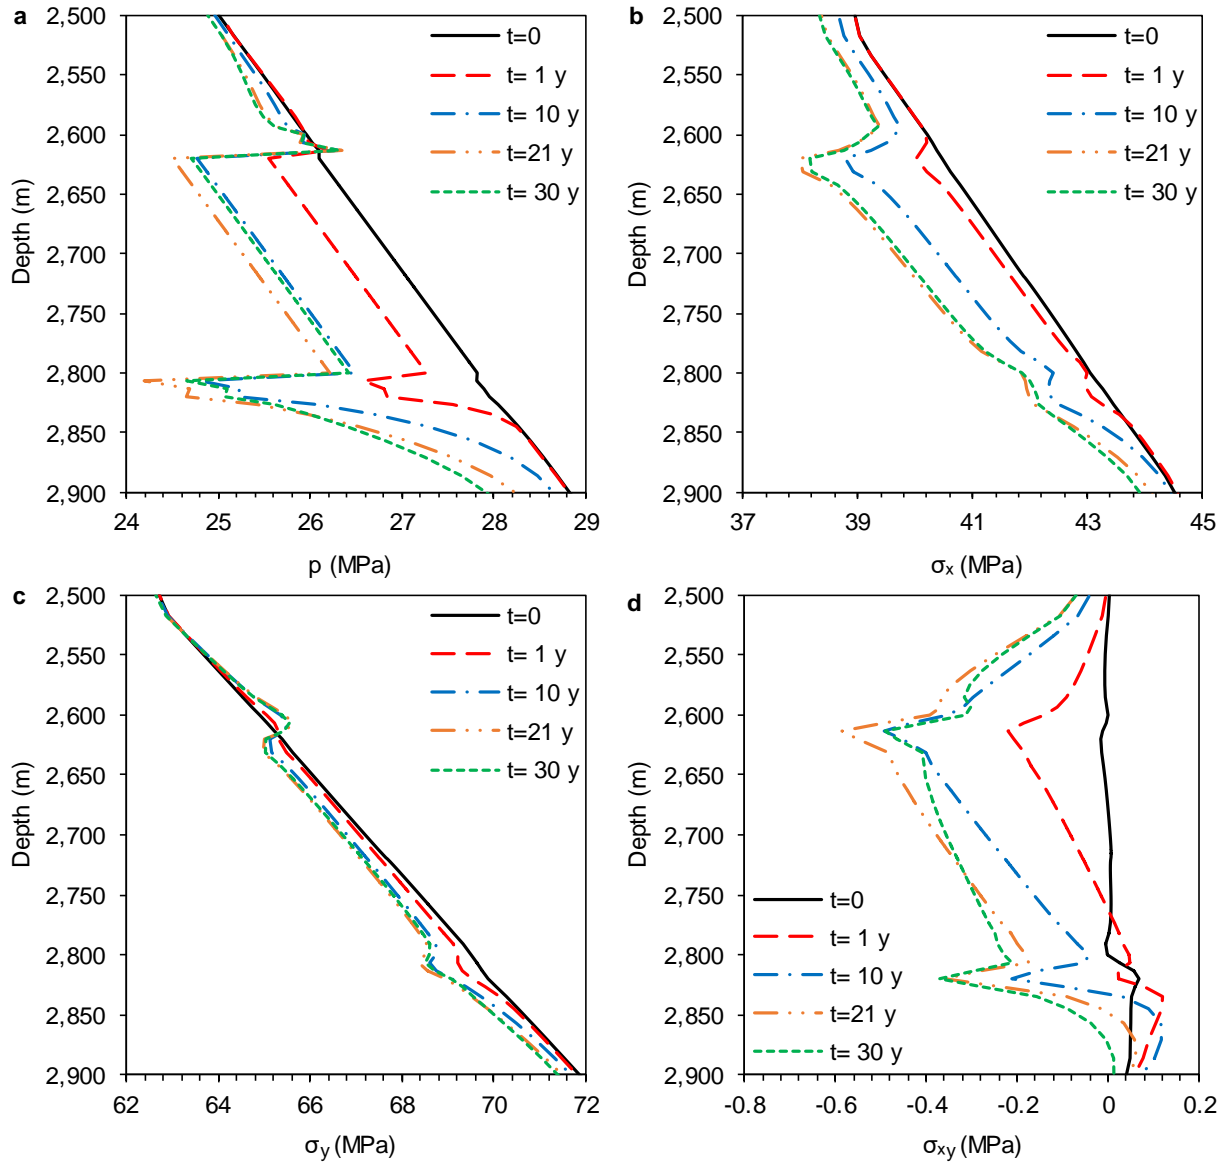

**Figure S2.** Pore pressure and stress evolution in fault 2. Evolution of the pore pressure (a), horizontal stress (b), vertical stress (c) and shear stress (d) along fault 2 at different times during cold water reinjection.
